# Supplementary material for: Use of the Blue Button Online Tool for Sharing Health Information: Qualitative Interviews With Patients and Providers
Source: PubMed Central journal article supplement (PMC4736289; doi:10.2196/jmir.4595), 2015-08-18

My HealtheVet

## *Personal Information Report*

\*\*\*\*\***CONFIDENTIAL**\*\*\*\*\*

Produced by the VA Blue Button (v12)

06 Dec 2011 @ 0736

This summary is a copy of information from your My HealtheVet Personal Health Record. Your summary contains information that you entered and may also include a copy of some of the information in your VA medical record as it becomes available in My HealtheVet. Please let your health care team know if you have questions about your health information. For some Veterans, information from the Department of Defense (DoD) is available. You will see this in VA Blue Button as DoD Military Service Information.

Name: MHVVETERAN, ONE A

Date of Birth: 01 Mar 1948

Blue Button  
Download  
My Data

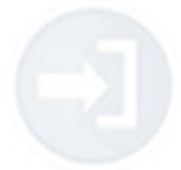

MEDICAL CONFIDENTIAL

## Demographics

|                     |                            |
|---------------------|----------------------------|
| Source:             | Self-Entered               |
| First Name:         | ONE                        |
| Middle Initial:     | A                          |
| Last Name:          | MHVVETERAN                 |
| Suffix:             |                            |
| Alias:              | MHVVET                     |
| Relationship to VA: | Patient, Veteran, Employee |
| Current Occupation  | Truck Driver               |
| Home Phone Number:  | 000-010-0101               |
| Work Phone Number:  | 000-020-0202               |
| Pager Number:       | 000-030-0303               |
| Cell Phone Number:  | 000-040-0404               |
| FAX Number:         | 000-050-0505               |

|                 |             |
|-----------------|-------------|
| Date of Birth:  | 01 Mar 1948 |
| Gender:         | Male        |
| Blood Type:     | AB+         |
| Organ Donor:    | Yes         |
| Marital Status: | Married     |

### Mailing or Destination Address:

123 Anywhere Road  
 Apartment 123  
 Anywhere, DC  
 United States  
 00001

|                              |                                                                              |
|------------------------------|------------------------------------------------------------------------------|
| Email Address:               | <a href="mailto:mhvveteran@emailaddress.com">mhvveteran@emailaddress.com</a> |
| Preferred Method of Contact: | Email                                                                        |

Blue Button  
 Download  
 My Data

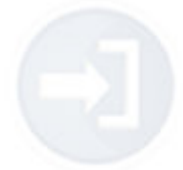

MEDICAL CONFIDENTIAL

## *Emergency Contacts*

|                     |                                                                        |                                                                                                  |
|---------------------|------------------------------------------------------------------------|--------------------------------------------------------------------------------------------------|
| Contact First Name: | Two                                                                    | Mailing Address:<br>123 Anywhere Road<br>Apartment 123<br>Anywhere, DC<br>United States<br>00001 |
| Contact Last Name:  | MHVVeteran                                                             |                                                                                                  |
| Relationship:       |                                                                        |                                                                                                  |
| Home Phone Number:  | 000-010-0101                                                           |                                                                                                  |
| Work Phone Number:  | 000-060-0606 Ext 123                                                   |                                                                                                  |
| Cell Phone Number:  | 000-070-0707                                                           |                                                                                                  |
| Email:              | <a href="mailto:twomhvveteran@domain.com">twomhvveteran@domain.com</a> |                                                                                                  |

|                     |                                                                            |                                                                                                  |
|---------------------|----------------------------------------------------------------------------|--------------------------------------------------------------------------------------------------|
| Contact First Name: | Three                                                                      | Mailing Address:<br>123 Anywhere Road<br>Apartment 123<br>Anywhere, DC<br>United States<br>00001 |
| Contact Last Name:  | MHVVeteran                                                                 |                                                                                                  |
| Relationship:       |                                                                            |                                                                                                  |
| Home Phone Number:  | 000-010-0101                                                               |                                                                                                  |
| Work Phone Number:  | 000-080-0808 Ext 123                                                       |                                                                                                  |
| Cell Phone Number:  | 000-090-0909                                                               |                                                                                                  |
| Email:              | <a href="mailto:threemhvveteran@domain.com">threemhvveteran@domain.com</a> |                                                                                                  |

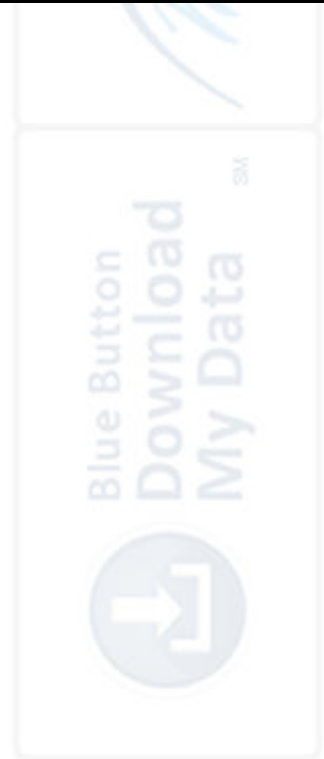

MEDICAL CONFIDENTIAL

## Healthcare Providers

|         |              |
|---------|--------------|
| Source: | Self-Entered |
|---------|--------------|

|                              |                                                                                       |
|------------------------------|---------------------------------------------------------------------------------------|
| Provider Name:               | John Doe                                                                              |
| Type of Provider:            | Primary                                                                               |
| Other Clinician Information: |                                                                                       |
| Phone Number:                | 000-000-0000 Ext: 1234                                                                |
| Email:                       | <a href="mailto:provider@institution.org">provider@institution.org</a>                |
| Comments:                    | Dr. Doe can be reached on the weekend if needed by leaving a message with the clinic. |

|                              |                                                                                                                            |
|------------------------------|----------------------------------------------------------------------------------------------------------------------------|
| Provider Name:               | Jane Smith                                                                                                                 |
| Type of Provider:            | Specialist                                                                                                                 |
| Other Clinician Information: | Seen as needed                                                                                                             |
| Phone Number:                | 000-000-0001 Ext: 1234                                                                                                     |
| Email:                       | <a href="mailto:specialist@institution.org">specialist@institution.org</a>                                                 |
| Comments:                    | Dr. Smith should be notified of any changes in my medical condition. Requires a referral from my health insurance company. |

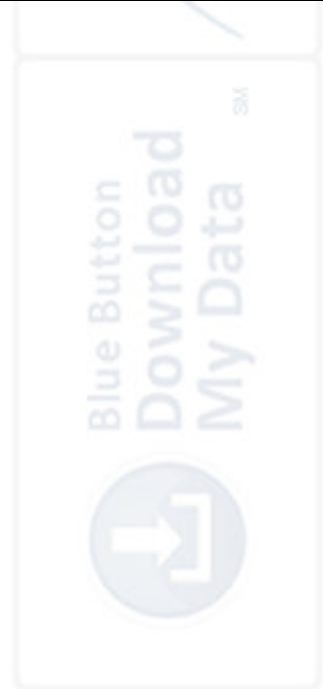

MEDICAL CONFIDENTIAL

## Treatment Facilities

Source: Self-Entered

|                   |                                                      |                  |
|-------------------|------------------------------------------------------|------------------|
| Facility Name:    | Anywhere VA Medical Center                           |                  |
| Facility Type:    | VA                                                   | Mailing Address: |
| VA Home Facility: | Yes                                                  | 123 VA Drive     |
| Phone Number:     | 000-000-0001 Ext:1234                                | Suite 4          |
| FAX Number:       | 000-000-0002                                         | Anywhere, DC     |
| Comments:         | Contact clinic when calling to make my appointments. | United States    |
|                   |                                                      | 00001            |

|                   |                                                          |                   |
|-------------------|----------------------------------------------------------|-------------------|
| Facility Name:    | Health Care Inc.                                         |                   |
| Facility Type:    | Non-VA                                                   | Mailing Address:  |
| VA Home Facility: | No                                                       | 123 Anywhere Road |
| Phone Number:     | 000-000-0002 Ext:5678                                    | B-Wing            |
| FAX Number:       | 000-000-0003                                             | Anywhere, DC      |
| Comments:         | Reminder to bring My HealtheVet printouts for all visits | United States     |
|                   |                                                          | 00001             |



MEDICAL CONFIDENTIAL

## Health Insurance

Source: Self-Entered

|                                                       |                                                     |               |             |
|-------------------------------------------------------|-----------------------------------------------------|---------------|-------------|
| Health Insurance Company: My Health Insurance Company |                                                     |               |             |
| ID Number:                                            | 0001234                                             | Group Number: | 0000000     |
| Primary Insurance Provider:                           | Yes                                                 | Start Date:   | 01 Jan 2000 |
| Insured:                                              | One Mhvveteran                                      | Stop Date:    |             |
| Pre-Approval Phone Number:                            | 000-000-0003                                        |               |             |
| Health Insurance Company Phone Number:                | 000-000-0004                                        |               |             |
| Comments:                                             | Need to get pre-authorization for special services. |               |             |

|                                                             |                                      |               |              |
|-------------------------------------------------------------|--------------------------------------|---------------|--------------|
| Health Insurance Company: My Other Health Insurance Company |                                      |               |              |
| ID Number:                                                  | 000567891010                         | Group Number: | ABC123456789 |
| Primary Insurance Provider:                                 | No                                   | Start Date:   | 01 Jan 2009  |
| Insured:                                                    | One Mhvveteran                       | Stop Date:    |              |
| Pre-Approval Phone Number:                                  | 000-000-0005                         |               |              |
| Health Insurance Company Phone Number:                      | 000-000-0005                         |               |              |
| Comments:                                                   | Coverage only for vision and dental. |               |              |

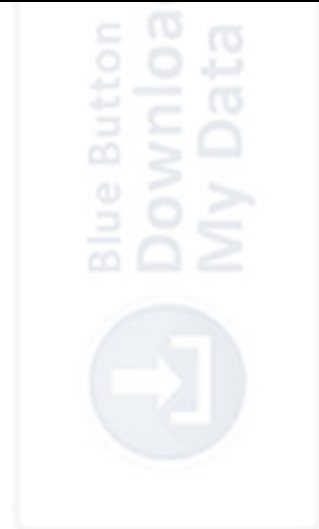

MEDICAL CONFIDENTIAL

## VA Wellness Reminders

|                                                                                                                                                                       |                    |
|-----------------------------------------------------------------------------------------------------------------------------------------------------------------------|--------------------|
| Source:                                                                                                                                                               | VA                 |
| Last Updated:                                                                                                                                                         | 06 Dec 2011 @ 0735 |
| Sorted By:                                                                                                                                                            | Name (Ascending)   |
| <p>Learn more about these Wellness Reminders by visiting My HealtheVet. Please contact your health care team with any questions about your VA Wellness Reminders.</p> |                    |

| Wellness Reminder               | Due Date | Last Completed | Location |
|---------------------------------|----------|----------------|----------|
| Influenza Vaccine               | DUE NOW  | UNKNOWN        | DAYT29   |
| Colon Cancer Screening          | DUE NOW  | UNKNOWN        | DAYT29   |
| FYI-More Personal Wellness Info | DUE NOW  | UNKNOWN        | DAYT29   |



Blue Button  
Download  
My Data <sup>SM</sup>



MEDICAL CONFIDENTIAL

## VA Appointments

|                                                                                       |                    |
|---------------------------------------------------------------------------------------|--------------------|
| Source:                                                                               | VA                 |
| Last Updated:                                                                         | 06 Dec 2011 @ 0735 |
| Sorted By:                                                                            | Date (Descending)  |
| VA Past Appointments are limited to two years from the date of your download request. |                    |

### Past Appointments

|               |                                      |
|---------------|--------------------------------------|
| Date/Time:    | 13 Oct 2011 @ 1600                   |
| Location:     | DAYT29 TEST LAB                      |
| Status:       | NOT APPLICABLE                       |
| Clinic:       | C&P XXXXXX                           |
| Phone Number: | 3929                                 |
| Type:         | Compensation and Pension Appointment |

|               |                            |
|---------------|----------------------------|
| Date/Time:    | 07 Sep 2011 @ 1100         |
| Location:     | DAYT29 TEST LAB            |
| Status:       | NOT APPLICABLE             |
| Clinic:       | TELEPHONE CALLS/GERIATRICS |
| Phone Number: | XXXX                       |

|               |                                                                                    |
|---------------|------------------------------------------------------------------------------------|
| Date/Time:    | 27 Jul 2011 @ 1400                                                                 |
| Location:     | DAYT29 TEST LAB                                                                    |
| Status:       | NOT APPLICABLE                                                                     |
| Clinic:       | DIABETIC-XXXXXX                                                                    |
| Phone Number: | 800-123-1234                                                                       |
| Note:         | This Appointment has preappointment activity scheduled:<br>Lab: 27 Jul 2011 @ 1000 |

|               |                                                                                                                                            |
|---------------|--------------------------------------------------------------------------------------------------------------------------------------------|
| Date/Time:    | 15 Jun 2011 @ 1300                                                                                                                         |
| Location:     | DAYT29 TEST LAB                                                                                                                            |
| Status:       | NOT APPLICABLE                                                                                                                             |
| Clinic:       | DIABETIC-XXXXXX                                                                                                                            |
| Phone Number: | 800-123-1234                                                                                                                               |
| Note:         | This Appointment has preappointment activity scheduled:<br>Lab: 15 Jun 2011 @ 0800<br>EKG: 15 Jun 2011 @ 1030<br>X-Ray: 15 Jun 2011 @ 0900 |

|            |                            |
|------------|----------------------------|
| Date/Time: | 03 May 2011 @ 1100         |
| Location:  | DAYT29 TEST LAB            |
| Status:    | NOT APPLICABLE             |
| Clinic:    | TELEPHONE CALLS/GERIATRICS |

MEDICAL CONFIDENTIAL



## VA Medication History

|                                                                                                                                         |                             |
|-----------------------------------------------------------------------------------------------------------------------------------------|-----------------------------|
| Source:                                                                                                                                 | VA                          |
| Last Updated:                                                                                                                           | 11 Apr 2011 @ 1737          |
| Sorted By:                                                                                                                              | Last Filled On (Descending) |
| VA Medication History includes up to two years of medication history unless you select a different date range in your download request. |                             |

|                       |                                                                                    |          |                     |
|-----------------------|------------------------------------------------------------------------------------|----------|---------------------|
| Medication:           | AMLODIPINE BESYLATE 10MG TAB                                                       |          |                     |
| Instructions:         | TAKE ONE TABLET BY MOUTH TAKE ONE-HALF TABLET FOR 1 DAY --AVOID GRAPEFRUIT JUICE-- |          |                     |
| Status:               | Active                                                                             |          |                     |
| Refills Remaining:    | 3                                                                                  |          |                     |
| Last Filled On:       | 20 Aug 2010                                                                        |          |                     |
| Initially Ordered On: | 13 Aug 2010                                                                        |          |                     |
| Quantity              | Days Supply                                                                        | Pharmacy | Prescription Number |
| 45                    | 90                                                                                 | DAYTON   | 2718953             |

|                       |                                                               |          |                     |
|-----------------------|---------------------------------------------------------------|----------|---------------------|
| Medication:           | IBUPROFEN 600MG TAB                                           |          |                     |
| Instructions:         | TAKE ONE TABLET BY MOUTH FOUR TIMES A DAY WITH FOOD AS NEEDED |          |                     |
| Status:               | Active                                                        |          |                     |
| Refills Remaining:    | 3                                                             |          |                     |
| Last Filled On:       | 20 Aug 2010                                                   |          |                     |
| Initially Ordered On: | 01 Jul 2010                                                   |          |                     |
| Quantity              | Days Supply                                                   | Pharmacy | Prescription Number |
| 240                   | 60                                                            | DAYTON   | 2718960             |

|                       |                                                                                                                                                                    |          |                     |
|-----------------------|--------------------------------------------------------------------------------------------------------------------------------------------------------------------|----------|---------------------|
| Medication:           | INSULIN,GLARGINE,HUMAN 100 UNT/ML INJ                                                                                                                              |          |                     |
| Instructions:         | INJECT 10 ML VIAL UNDER THE SKIN AS DIRECTED FOR 28 DAYS INJECT 25 UNITS UNDER THE SKIN AT BEDTIME DO NOT MIX WITH OTHER INSULINS/DISCARD OPEN VIALS AFTER 28 DAYS |          |                     |
| Status:               | Active                                                                                                                                                             |          |                     |
| Refills Remaining:    | 3                                                                                                                                                                  |          |                     |
| Last Filled On:       | 20 Aug 2010                                                                                                                                                        |          |                     |
| Initially Ordered On: | 01 Jul 2010                                                                                                                                                        |          |                     |
| Quantity              | Days Supply                                                                                                                                                        | Pharmacy | Prescription Number |
| 30                    | 30                                                                                                                                                                 | DAYTON   | 2718956             |

|                    |                                          |  |  |
|--------------------|------------------------------------------|--|--|
| Medication:        | TERAZOSIN HCL 2MG CAP                    |  |  |
| Instructions:      | TAKE THREE CAPSULES BY MOUTH AT BEDTIME. |  |  |
| Status:            | Active                                   |  |  |
| Refills Remaining: | 2                                        |  |  |
| Last Filled On:    | 20 Aug 2010                              |  |  |

MEDICAL CONFIDENTIAL

## Medications & Supplements

|         |              |
|---------|--------------|
| Source: | Self-Entered |
|---------|--------------|

|                      |                                |             |             |
|----------------------|--------------------------------|-------------|-------------|
| Category:            | RX Medication                  |             |             |
| Drug Name:           | Aspirin EC                     |             |             |
| Prescription Number: | 010101B                        | Start Date: | 15 Jun 2005 |
| Strength:            | 81mg                           | Stop Date:  |             |
| Dose:                | 1 tab                          |             |             |
| Frequency:           | daily                          |             |             |
| Pharmacy Name:       | My Local Drugstore             |             |             |
| Pharmacy Phone:      | 000-010-0000                   |             |             |
| Reason for Taking:   | Daily regimen for heart health |             |             |
| Comments:            |                                |             |             |

|                      |                                  |             |             |
|----------------------|----------------------------------|-------------|-------------|
| Category:            | OTC                              |             |             |
| Drug Name:           | Cough Medicine                   |             |             |
| Prescription Number: |                                  | Start Date: | 01 Feb 2010 |
| Strength:            | 1000mg                           | Stop Date:  | 21 Feb 2010 |
| Dose:                | 2 TBS                            |             |             |
| Frequency:           | morning and night                |             |             |
| Pharmacy Name:       | My Local Drugstore               |             |             |
| Pharmacy Phone:      | 000-010-0000                     |             |             |
| Reason for Taking:   | Cough was keeping me up at night |             |             |
| Comments:            | Cleared up after a few weeks     |             |             |

|                      |                                         |             |             |
|----------------------|-----------------------------------------|-------------|-------------|
| Category:            | Herbal                                  |             |             |
| Drug Name:           | Ginkgo biloba                           |             |             |
| Prescription Number: |                                         | Start Date: | 08 Mar 2008 |
| Strength:            |                                         | Stop Date:  |             |
| Dose:                | 2 capsules                              |             |             |
| Frequency:           | once a day                              |             |             |
| Pharmacy Name:       | My Local Drugstore                      |             |             |
| Pharmacy Phone:      | 000-010-0000                            |             |             |
| Reason for Taking:   | Wife suggested to improve concentration |             |             |
| Comments:            | Take in the morning with breakfast      |             |             |

|                      |                |             |             |
|----------------------|----------------|-------------|-------------|
| Category:            | Supplement     |             |             |
| Drug Name:           | Multi-vitamin  |             |             |
| Prescription Number: |                | Start Date: | 18 Mar 2010 |
| Strength:            | 100% RDA       | Stop Date:  |             |
| Dose:                | 1 tablet daily |             |             |
| Frequency:           | morning        |             |             |

MEDICAL CONFIDENTIAL

## VA Allergies

|                                                                                            |                    |
|--------------------------------------------------------------------------------------------|--------------------|
| Source:                                                                                    | VA                 |
| Last Updated:                                                                              | 06 Dec 2011 @ 0735 |
| Sorted By:                                                                                 | Date (Descending)  |
| Please contact your health care team with any questions about your VA Allergy information. |                    |

|                      |                                                    |               |             |
|----------------------|----------------------------------------------------|---------------|-------------|
| Allergy Name:        | TRIMETHOPRIM                                       | Date Entered: | 09 Mar 2011 |
| Allergy Type:        | DRUG                                               | Location:     | DAYT29      |
| Reaction:            |                                                    |               |             |
| VA Drug Class:       | ANTI-INFECTIVES,OTHER                              |               |             |
| Observed/Historical: | HISTORICAL                                         |               |             |
| Comments:            | The reaction to this allergy was MILD (NO SQUELAE) |               |             |

|                      |                                                                                                                         |               |             |
|----------------------|-------------------------------------------------------------------------------------------------------------------------|---------------|-------------|
| Allergy Name:        | TRAMADOL                                                                                                                | Date Entered: | 09 Mar 2011 |
| Allergy Type:        | DRUG                                                                                                                    | Location:     | DAYT29      |
| Reaction:            | URINARY RETENTION                                                                                                       |               |             |
| VA Drug Class:       | NON-OPIOID ANALGESICS                                                                                                   |               |             |
| Observed/Historical: | HISTORICAL                                                                                                              |               |             |
| Comments:            | gradually worsening difficulty emptying bladder -- might try tramadol again cautiously because pt. reported pain relief |               |             |

|                      |                                    |               |             |
|----------------------|------------------------------------|---------------|-------------|
| Allergy Name:        | BACTRIM                            | Date Entered: | 09 Mar 2011 |
| Allergy Type:        | DRUG                               | Location:     | DAYT29      |
| Reaction:            |                                    |               |             |
| VA Drug Class:       | SULFONAMIDE/RELATED ANTIMICROBIALS |               |             |
| Observed/Historical: | HISTORICAL                         |               |             |
| Comments:            | Causes Swelling of the Extremeties |               |             |

|                      |                                                                       |               |             |
|----------------------|-----------------------------------------------------------------------|---------------|-------------|
| Allergy Name:        | TERAZOSIN                                                             | Date Entered: | 09 Mar 2011 |
| Allergy Type:        | DRUG                                                                  | Location:     | DAYT29      |
| Reaction:            | DIZZINESS                                                             |               |             |
| VA Drug Class:       | ALPHA BLOCKERS/RELATED                                                |               |             |
| Observed/Historical: | HISTORICAL                                                            |               |             |
| Comments:            | Lightheadedness on 10mg qhs Terazoin resolved upon stopping Terazoin. |               |             |

|                      |                                                                                             |               |             |
|----------------------|---------------------------------------------------------------------------------------------|---------------|-------------|
| Allergy Name:        | METHOCARBAMOL                                                                               | Date Entered: | 09 Mar 2011 |
| Allergy Type:        | DRUG                                                                                        | Location:     | DAYT29      |
| Reaction:            | CONFUSION, DROWSINESS                                                                       |               |             |
| VA Drug Class:       | SKELETAL MUSCLE RELAXANTS                                                                   |               |             |
| Observed/Historical: | OBSERVED                                                                                    |               |             |
| Comments:            | Drowsiness and hallucinations while on methocarbamol plus carbamazepine and other sedatives |               |             |

## Allergies/Adverse Reactions

Source: Self-Entered

|               |                                                                                            |            |             |
|---------------|--------------------------------------------------------------------------------------------|------------|-------------|
| Allergy Name: | Peanuts                                                                                    | Date:      | 01 Aug 1980 |
| Severity:     | Moderate                                                                                   | Diagnosed: | Yes         |
| Reaction:     | Hives                                                                                      |            |             |
| Comments:     | Avoid peanuts and peanut based foods. Foods cooked with peanut oil also cause the reaction |            |             |

|               |                                        |            |             |
|---------------|----------------------------------------|------------|-------------|
| Allergy Name: | Pollen                                 | Date:      | 18 Mar 2010 |
| Severity:     | Mild                                   | Diagnosed: | Yes         |
| Reaction:     | Watery eyes, itchy nose                |            |             |
| Comments:     | Took an over the counter antihistamine |            |             |

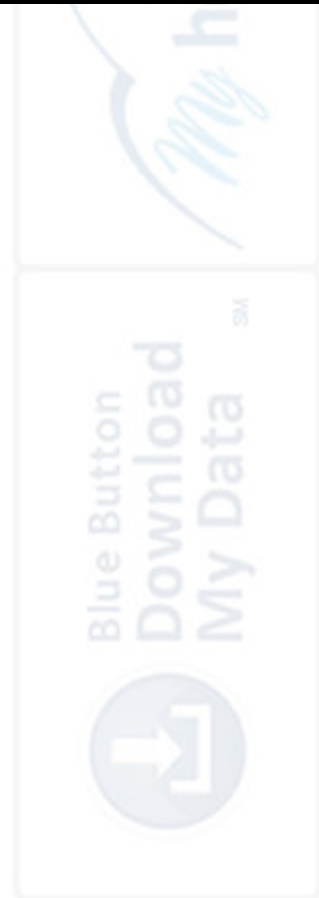

CONFIDENTIAL

## Medical Events

Source: Self-Entered

|                 |                                                    |             |             |
|-----------------|----------------------------------------------------|-------------|-------------|
| Medical Events: | Colonoscopy                                        | Start Date: | 18 Mar 2000 |
| Response:       | Colonoscopy when well                              | Stop Date:  | 18 Mar 2000 |
| Comments:       | Polyps were removed. Doctor said these were benign |             |             |

|                 |                                                                                                                        |             |             |
|-----------------|------------------------------------------------------------------------------------------------------------------------|-------------|-------------|
| Medical Events: | Broken right arm                                                                                                       | Start Date: | 04 Jan 2010 |
| Response:       | Placed in cast from my hand to my elbow                                                                                | Stop Date:  | 17 Feb 2010 |
| Comments:       | Went to community hospital emergency room since I was on vacation. Followed up with my VA doctor when I returned home. |             |             |

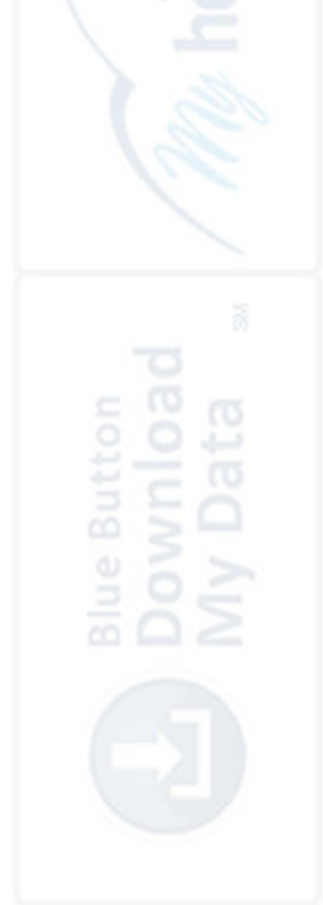

MEDICAL CONFIDENTIAL

## Immunizations

Source: Self-Entered

|               |                                    |                |             |
|---------------|------------------------------------|----------------|-------------|
| Immunization: | Measles + Rubella (German Measles) | Date Received: | 01 Mar 1950 |
| Other:        | none                               | Method:        | Injection   |
| Reactions:    | Pain                               |                |             |
| Comments:     | Received as a child                |                |             |

|               |                 |                |             |
|---------------|-----------------|----------------|-------------|
| Immunization: | Flu             | Date Received: | 01 Sep 2009 |
| Other:        | H1N1            | Method:        | Inhalant    |
| Reactions:    |                 |                |             |
| Comments:     | Had no reaction |                |             |

|               |                         |                |             |
|---------------|-------------------------|----------------|-------------|
| Immunization: | Tetanus                 | Date Received: | 18 Jul 2010 |
| Other:        | none                    | Method:        | Injection   |
| Reactions:    | Pain                    |                |             |
| Comments:     | stepped on a rusty nail |                |             |

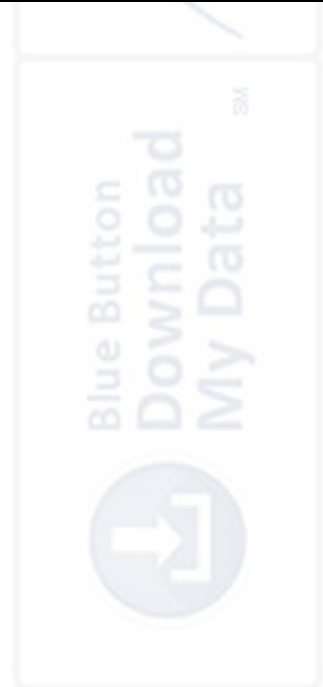

MEDICAL CONFIDENTIAL

## VA Laboratory Results

|                                                                                                                                                                                                                                                                                                                                                                                                 |                                      |
|-------------------------------------------------------------------------------------------------------------------------------------------------------------------------------------------------------------------------------------------------------------------------------------------------------------------------------------------------------------------------------------------------|--------------------------------------|
| Source:                                                                                                                                                                                                                                                                                                                                                                                         | VA                                   |
| Last Updated:                                                                                                                                                                                                                                                                                                                                                                                   | 06 Dec 2011 @ 0735                   |
| Sorted By:                                                                                                                                                                                                                                                                                                                                                                                      | Date Specimen Collected (Descending) |
| <p>VA Laboratory Results includes up to two years of history unless you select a different date range in your download request. Test results slightly outside the reference range are not unusual. Your provider has reviewed your test results and will contact you for any important issues. If you have further questions, please do not hesitate to contact your primary care provider.</p> |                                      |

|                      |                      |                    |                 |
|----------------------|----------------------|--------------------|-----------------|
| Lab Test:            | Prothrombin Time+PTT |                    |                 |
| Lab Type:            | Chemistry/Hematology | Ordering Provider: | XXXXXX          |
| Specimen:            | Plasma               | Ordering Location: | DAYTON, OH VAMC |
| Date/Time Collected: | 27 Jun 2011          |                    |                 |

| Test Name                                                                                                                                                                                                                                                                    | Result   | Units   | Reference Range | Status | Performing Location |
|------------------------------------------------------------------------------------------------------------------------------------------------------------------------------------------------------------------------------------------------------------------------------|----------|---------|-----------------|--------|---------------------|
| COAGULATION SURFACE INDUCED.FACTOR SUBSTITUTION~IMMEDIATELY AFTER ADDITION OF NORMAL PLASMA<br>Interpretation:                                                                                                                                                               | 13.2 Low | SECONDS | (59.0-104.0)    | Final  | DAYTON, OH VAMC     |
| Current normal range = 20.3 -35.8 seconds.<br>Normal range prior to 7/5/02 was 25.3 - 40.4 sec.<br>Normal range prior to 2/26/98 was 26.1 - 43.0 sec.<br>Therapeutic range prior to 7/5/02 was 67.0 - 118.0 sec.<br>Therapeutic range prior to 2/26/98 was 72.0 - 126.0 sec. |          |         |                 |        |                     |
| COAGULATION TISSUE FACTOR INDUCED<br>Interpretation:                                                                                                                                                                                                                         | 9.9 Low  | SECONDS | (23.0-33.0)     | Final  | DAYTON, OH VAMC     |
| Current normal range = 10.8 - 13.7 seconds.<br>Normal range prior to 7/5/02 was 10.7 - 14.1 seconds.<br>INR should be used for therapeutic decisions.                                                                                                                        |          |         |                 |        |                     |
| COAGULATION TISSUE FACTOR INDUCED.INR<br>Interpretation:                                                                                                                                                                                                                     | .7       |         | (2-3)           | Final  | DAYTON, OH VAMC     |
| FOR ADDITIONAL INFORMATION - CHECK INR UNDER "TEST DESCRIPTION INFO"                                                                                                                                                                                                         |          |         |                 |        |                     |

|           |                                                       |
|-----------|-------------------------------------------------------|
| Comments: | For Test: COAGULATION (PT & PTT)<br>ANTICOAGULANT: PT |
|-----------|-------------------------------------------------------|

|                                   |                                                         |
|-----------------------------------|---------------------------------------------------------|
| Performing Location Name/Address: | DAYTON, OH VAMC 4100 W. THIRD STREET , DAYTON, OH 45428 |
|-----------------------------------|---------------------------------------------------------|

|           |                      |          |        |
|-----------|----------------------|----------|--------|
| Lab Test: | Hemogram V           |          |        |
| Lab Type: | Chemistry/Hematology | Ordering | XXXXXX |

MEDICAL CONFIDENTIAL

|                                                                                                     |            |                    |                 | <b>Provider:</b>          |                     |
|-----------------------------------------------------------------------------------------------------|------------|--------------------|-----------------|---------------------------|---------------------|
| <b>Specimen:</b>                                                                                    |            | Whole blood        |                 | <b>Ordering Location:</b> | DAYTON, OH VAMC     |
| <b>Date/Time Collected:</b>                                                                         |            | 22 Mar 2011 @ 1000 |                 |                           |                     |
| Test Name                                                                                           | Result     | Units              | Reference Range | Status                    | Performing Location |
| ERYTHROCYTE DISTRIBUTION WIDTH                                                                      | 40 High    | %                  | (11.5-14.5)     | Final                     | DAYTON, OH VAMC     |
| ERYTHROCYTE MEAN CORPUSCULAR HEMOGLOBIN                                                             | 20 Low     | pg                 | (27-31)         | Final                     | DAYTON, OH VAMC     |
| ERYTHROCYTE MEAN CORPUSCULAR HEMOGLOBIN CONCENTRATION                                               | 30 Low     | gm/dl              | (33-37)         | Final                     | DAYTON, OH VAMC     |
| ERYTHROCYTES                                                                                        | 4.44 Low   | m/cmm              | (4.7-6.1)       | Final                     | DAYTON, OH VAMC     |
| HEMATOCRIT                                                                                          | 47.1       | %                  | (42-52)         | Final                     | DAYTON, OH VAMC     |
| HEMOGLOBIN                                                                                          | 15.5       | g/dl               | (14-18)         | Final                     | DAYTON, OH VAMC     |
| LEUKOCYTES                                                                                          | 20 High    | t/cmm              | (4.8-10.8)      | Final                     | DAYTON, OH VAMC     |
| LYMPHOCYTES/100 LEUKOCYTES                                                                          | 14.9 Low   | %                  | (20.5-51.1)     | Final                     | DAYTON, OH VAMC     |
| MEAN CORPUSCULAR VOLUME                                                                             | 100.2 High | fl                 | (80-94)         | Final                     | DAYTON, OH VAMC     |
| PLATELET MEAN VOLUME                                                                                | 60 High    | fl                 | (7.4-10.4)      | Final                     | DAYTON, OH VAMC     |
| PLATELETS                                                                                           | 50 Low     | t/cmm              | (130-400)       | Final                     | DAYTON, OH VAMC     |
| <b>Comments:</b> This is a comment entered for this lab panel.                                      |            |                    |                 |                           |                     |
| <b>Performing Location Name/Address:</b><br>DAYTON, OH VAMC 4100 W. THIRD STREET , DAYTON, OH 45428 |            |                    |                 |                           |                     |

| <b>Lab Test:</b>            |        | Carbon Dioxide Content |                 |                           |                     |
|-----------------------------|--------|------------------------|-----------------|---------------------------|---------------------|
| <b>Lab Type:</b>            |        | Chemistry/Hematology   |                 | <b>Ordering Provider:</b> | XXXXXX              |
| <b>Specimen:</b>            |        | Serum                  |                 | <b>Ordering Location:</b> | DAYTON, OH VAMC     |
| <b>Date/Time Collected:</b> |        | 01 Dec 2010            |                 |                           |                     |
| Test Name                   | Result | Units                  | Reference Range | Status                    | Performing Location |
| CARBON DIOXIDE              |        | mEq/L                  | (23-33)         | Pending                   | DAYTON, OH VAMC     |

MEDICAL CONFIDENTIAL



## Labs & Tests

|                      |
|----------------------|
| Source: Self-Entered |
|----------------------|

|                                                            |                                 |
|------------------------------------------------------------|---------------------------------|
| Test Name: Blood Test                                      | Date: 06 Jun 2010               |
| Location Performed: Community Center                       | Provider: Red Cross Blood Drive |
| Results: Was not able to donate blood because iron was low |                                 |
| Comments: Will ask doctor at next visit                    |                                 |

|                                |                        |
|--------------------------------|------------------------|
| Test Name: Colonoscopy         | Date: 01 Jul 2010      |
| Location Performed: VAMC       | Provider: Provider One |
| Results: No new polyps         |                        |
| Comments: Keep high fiber diet |                        |



Blue Button  
Download  
My Data <sup>SM</sup>



MEDICAL CONFIDENTIAL

## Vitals & Readings

|                                                                                                       |                   |
|-------------------------------------------------------------------------------------------------------|-------------------|
| Source: Self-Entered                                                                                  |                   |
| Measurement Type: Blood pressure                                                                      | Date: 02 Aug 2010 |
| Systolic: 130                                                                                         | Time: 1720        |
| Diastolic: 76                                                                                         |                   |
| Comments: BP taken lying down                                                                         |                   |
| Measurement Type: Blood pressure                                                                      | Date: 02 Aug 2010 |
| Systolic: 132                                                                                         | Time: 1730        |
| Diastolic: 76                                                                                         |                   |
| Comments: BP taken standing. BP continues at goal. Doctor says to continue BP medications as directed |                   |
| Measurement Type: Heart rate                                                                          | Date: 02 Jun 2010 |
| Heart Rate: 160                                                                                       | Time: 1720        |
| Comments: Started taking Beta-Blockers after visit with physician                                     |                   |
| Measurement Type: Body weight                                                                         | Date: 02 Apr 2010 |
| Body Weight: 246                                                                                      | Time: 1720        |
| Measure: Pounds                                                                                       |                   |
| Comments: Talk to provider about weight management program at next visit                              |                   |
| Measurement Type: Body weight                                                                         | Date: 02 May 2010 |
| Body Weight: 244                                                                                      | Time: 1720        |
| Measure: Pounds                                                                                       |                   |
| Comments: Lost a few pounds and feel better. Walking daily                                            |                   |
| Measurement Type: Body weight                                                                         | Date: 02 Jun 2010 |
| Body Weight: 242                                                                                      | Time: 1720        |
| Measure: Pounds                                                                                       |                   |
| Comments: still walking when I have time off from work                                                |                   |
| Measurement Type: Body temperature                                                                    | Date: 02 Mar 2010 |
| Body Temperature: 98.5                                                                                | Time: 1720        |
| Measure: Fahrenheit                                                                                   |                   |
| Method: Mouth                                                                                         |                   |
| Comments: I wasn't feeling well but temperature is normal                                             |                   |
| Measurement Type: Pain                                                                                | Date: 01 Jan 2010 |
| Pain Level: 7                                                                                         | Time: 1720        |
| Comments: Lower back pain - took 1 Ibuprofen with food for pain                                       |                   |

## Family Health History

|         |              |
|---------|--------------|
| Source: | Self-Entered |
|---------|--------------|

|                      |                                                                                                                                                                                                                                                                                            |
|----------------------|--------------------------------------------------------------------------------------------------------------------------------------------------------------------------------------------------------------------------------------------------------------------------------------------|
| Relationship:        | Self                                                                                                                                                                                                                                                                                       |
| First Name:          | ONE                                                                                                                                                                                                                                                                                        |
| Last Name:           | MHVVETERAN                                                                                                                                                                                                                                                                                 |
| Living or Deceased   | Living                                                                                                                                                                                                                                                                                     |
| Health Issues:       | Back Pain<br>Insomnia<br>>1 beer/wine a day<br>Hearing Loss<br>Pneumonia<br>Smoking >1 pack/day<br>Allergies<br>Chicken Pox<br>Current Smoker<br>Diabetics Type 2<br>Overweight<br>High Blood Pressure<br>Depression<br>High Blood Cholesterol<br>Stomach/Bowel Other<br>Smoking >20 Years |
| Other Health Issues: | trouble sleeping                                                                                                                                                                                                                                                                           |
| Comments:            | I sometimes have trouble sleeping when stress is high at work                                                                                                                                                                                                                              |

|                      |                                                                        |
|----------------------|------------------------------------------------------------------------|
| Relationship:        | Mother                                                                 |
| First Name:          | Four                                                                   |
| Last Name:           | MHVVeteranMother                                                       |
| Living or Deceased   | Deceased                                                               |
| Health Issues:       | Cancer Other<br>Diabetics Type 2<br>Overweight<br>Joint Pain<br>Stroke |
| Other Health Issues: | Chronic joint pain                                                     |
| Comments:            | Mother died of cancer at age 40                                        |

MEDICAL CONFIDENTIAL

## *Military Health History*

|                |              |
|----------------|--------------|
| <b>Source:</b> | Self-Entered |
|----------------|--------------|

|                                         |                                    |
|-----------------------------------------|------------------------------------|
| <b>Event Title:</b>                     | Overseas Deployment                |
| <b>Event Date:</b>                      | 7 Apr 2002                         |
| <b>Service Branch:</b>                  | Army                               |
| <b>Rank:</b>                            | Captain                            |
| <b>Exposures:</b>                       | Yes                                |
| <b>Location of Service:</b>             | Overseas                           |
| <b>Onboard Ship:</b>                    | No                                 |
| <b>Military Occupational Specialty:</b> | Infantry                           |
| <b>Assignment:</b>                      | 1st Recon                          |
| <b>Exposures:</b>                       | Iraq: Exposed to burning chemicals |
| <b>Military Service Description:</b>    | Unit was in charge of security     |

---

**END MY HEALTHEVET PERSONAL HEALTH INFORMATION**

---

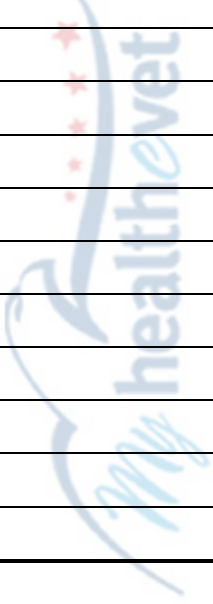


Blue Button  
**Download My Data**



Supplement: jmir_v17i8e199_app1.pdf [file jmir_v17i8e199_app1.pdf]
